# Supplementary material for: Effect of Span 20 Feeding Zone in the Twin Screw Extruder on the Properties of Amorphous Solid Dispersion of Ritonavir
Source: MDPI journal article supplement (doi:10.3390/pharmaceutics15020441), 2023-01-29
Supplement: s1 [file s1]

---

## Supplemental figures:

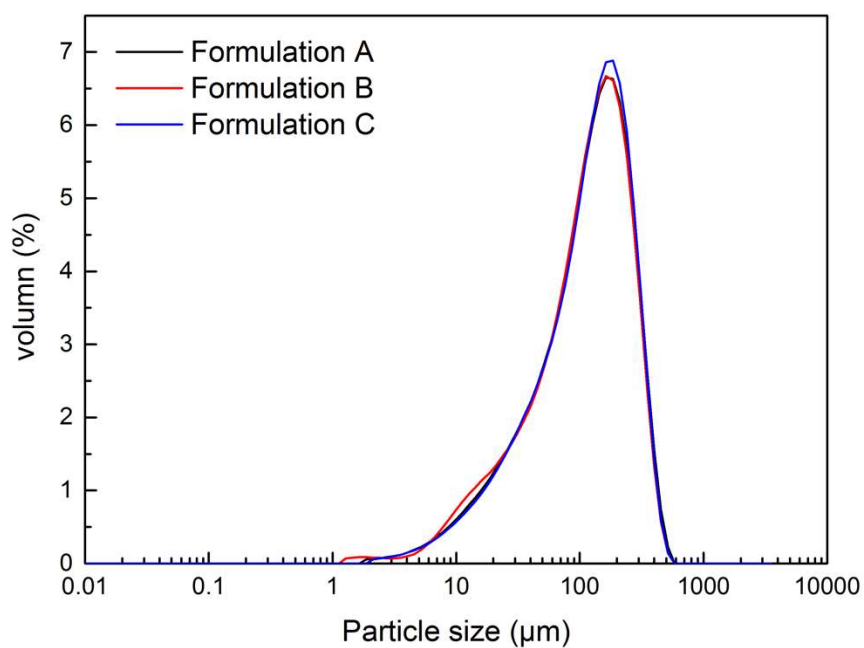

**Figure S1.** The particle size distributions of milled extrudates were measured by laser diffraction measurement (Mastersizer 3000, Malvern Instruments, UK) via the dry dispersion method following standard test procedures.

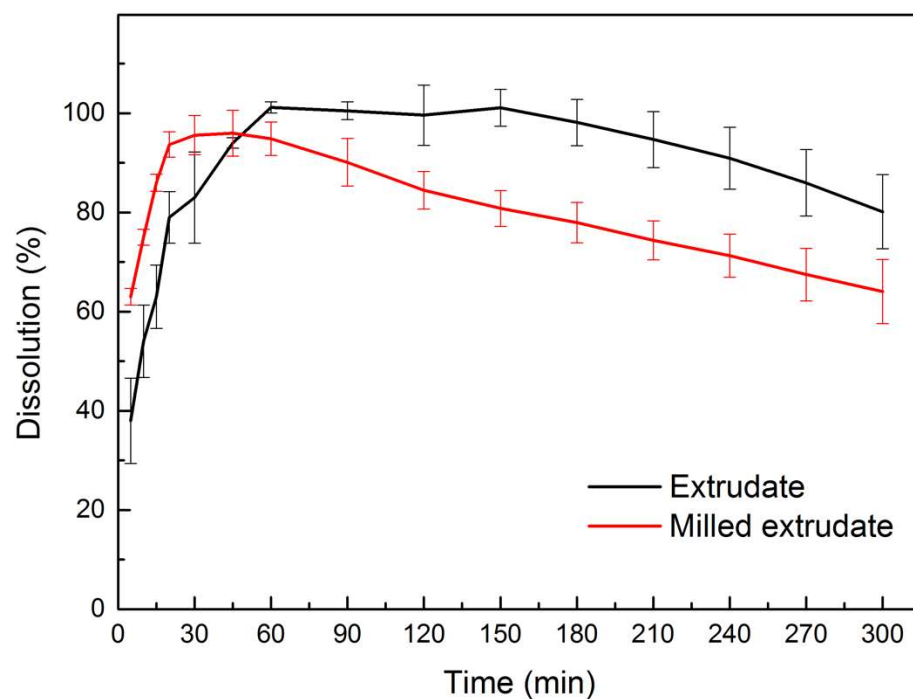

**Figure S2.** The dissolution of the ritonavir ASD formulation without the addition of Span 20 in the 900 ml aqueous medium using USP dissolution apparatus II.

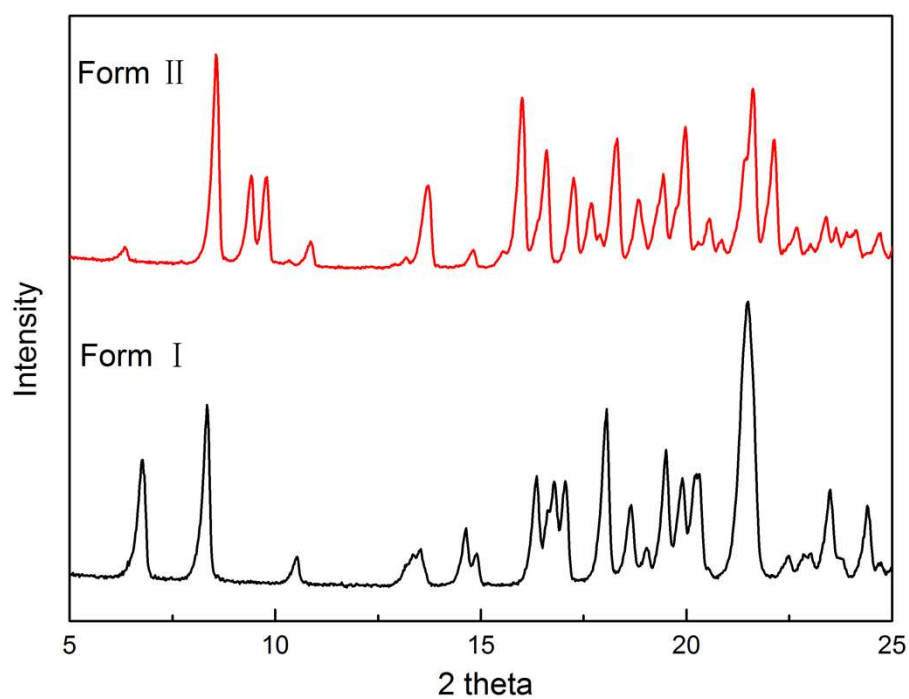

**Figure S3.** The PXRD of ritonavir Form I and Form II.

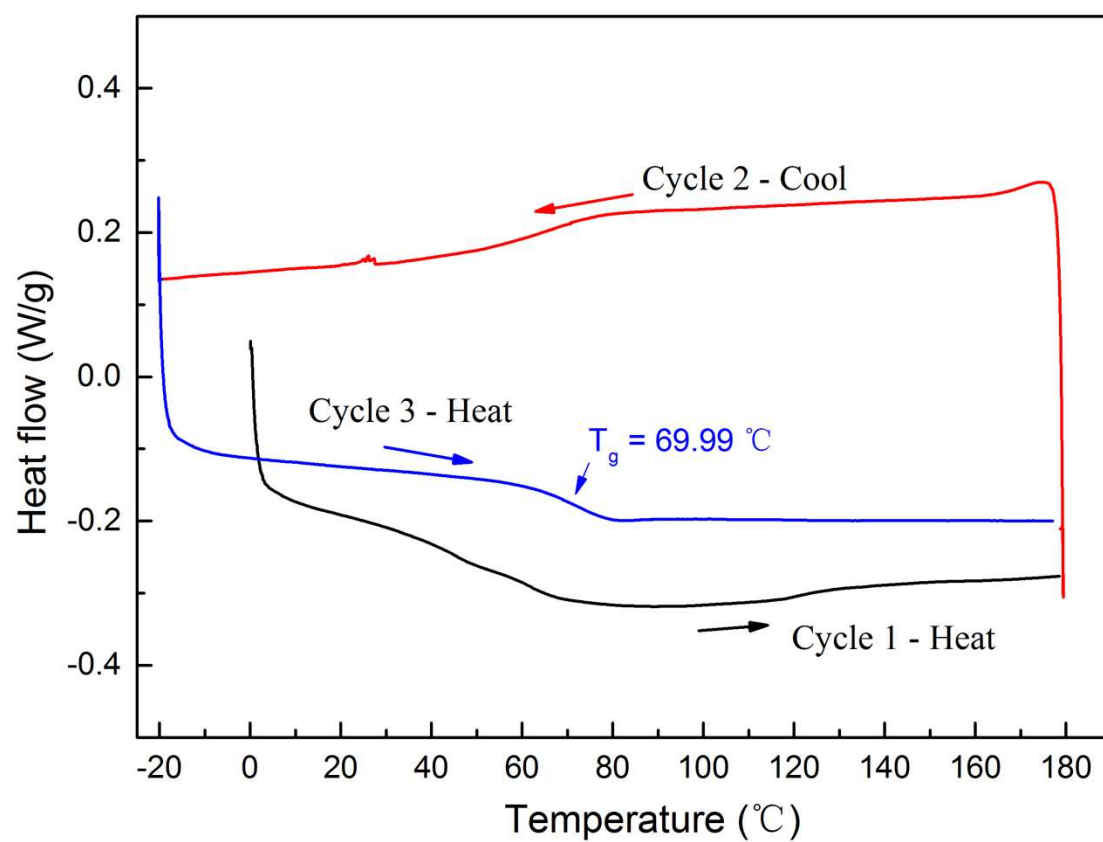

**Figure S4.** The DSC of ritonavir ternary ASD formulations prepared by solvent evaporation.

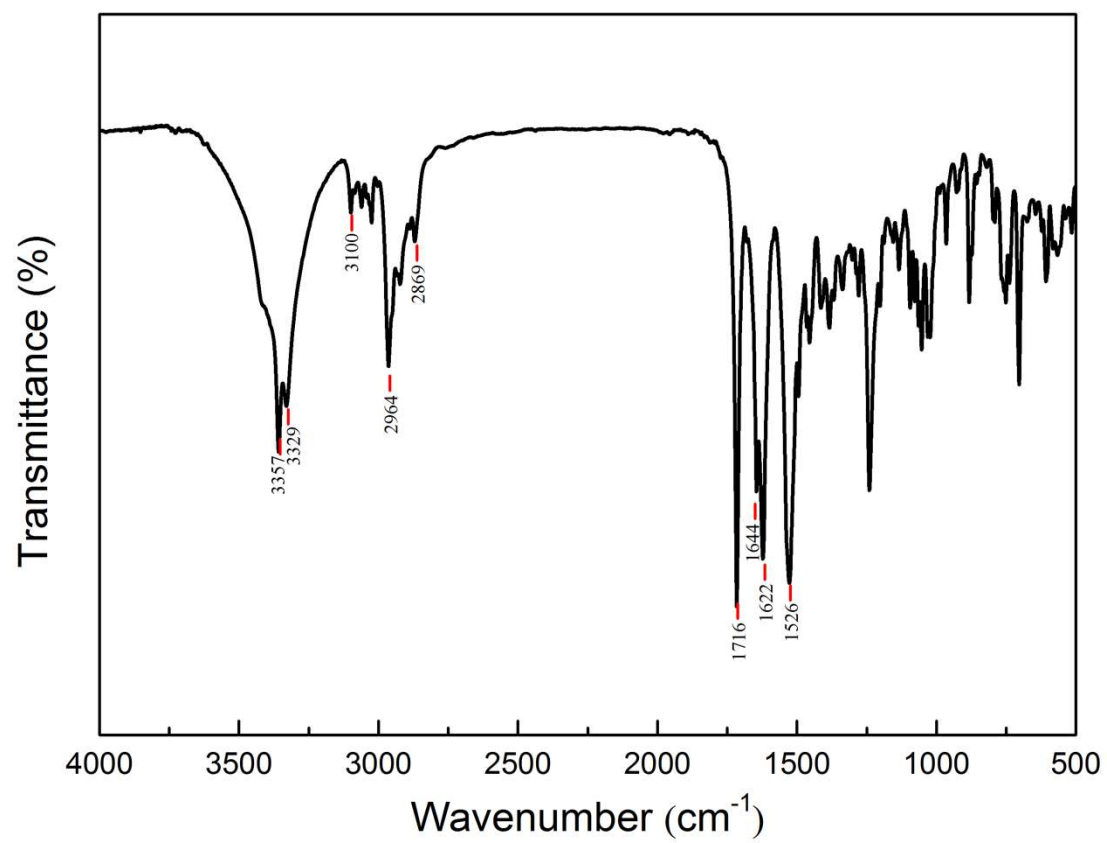

**Figure S5.** The infrared spectrum of ritonavir Form II.

---

**Supplemental tables:****Table S1.** PDI index of the particle size determination (mean  $\pm$  SD, n = 3).

| Formulations      |               | PDI index        |
|-------------------|---------------|------------------|
| physical mixtures |               | $0.93 \pm 0.115$ |
| extrudates        | Formulation A | $0.12 \pm 0.043$ |
|                   | Formulation B | $0.12 \pm 0.014$ |
|                   | Formulation C | $0.13 \pm 0.015$ |
| milled extrudates | Formulation A | $0.21 \pm 0.049$ |
|                   | Formulation B | $0.17 \pm 0.024$ |
|                   | Formulation C | $0.18 \pm 0.022$ |
